# Supplementary material for: MiR-371a-3p Serum Levels Are Increased in Recurrence of Testicular Germ Cell Tumor Patients
Source: PubMed Central journal article supplement (PMC6213366; doi:10.3390/ijms19103130), 2018-10-12
Supplement: ijms-19-03130-s001.pdf [file ijms-19-03130-s001.pdf]

| <b>Sample</b> | <b>Date of Sample Collection</b> | <b>AFP</b> | <b>betaHCG</b> | <b>LDH</b> |
|---------------|----------------------------------|------------|----------------|------------|
| 1             | 11.02.2002                       | 1288.7     | 0              | 240        |
| 2             | 11.09.2001                       | 1897.8     | 0              | 196        |
| 3             | 03.10.2001                       | 1614       | 0              | 167        |
| 4             | 06.01.2002                       | 305.7      | 0              | 157        |
| 5             | 16.03.2001                       | 887        | 0              | 154        |
| 6             | 08.05.2001                       | 210        | 0.9            | 156        |
| 8             | 27.07.2000                       | 14.4       | 0              | 175        |
| 9             | 29.11.2000                       | -9         | -9             | 135        |
| 10            | 15.12.2000                       | 229        | 0              | 262        |
| 11            | 08.09.2000                       | 8.8        | 1.2            | 176        |
| 13            | 16.08.2005                       | 9.1        | 1.2            | 200        |
| 14            | 12.08.2009                       | 7.4        | 1.2            | 215        |
| 15            | 03.03.2010                       | 7.7        | 1.2            | 189        |
| 16            | 01.09.2010                       | 6.6        | 1.2            | 174        |
| 17            | 17.12.2010                       | 9.5        | 1.2            | 192        |
| 18            | 18.02.2011                       | 7.4        | 1.2            | 190        |
| 19            | 25.04.2012                       | 3.4        | 1.2            | 163        |
| 20            | 14.01.2013                       | 3.3        | 1.2            | 162        |
| 21            | 16.04.2013                       | 3.6        | 1.2            | 163        |
| 22            | 30.07.2013                       | 3.1        | 1.2            | 165        |
| 23            | 04.11.2013                       | 2.7        | 1.2            | 187        |
| 24            | 31.01.2014                       | 3.6        | 2.8            | 152        |
| 25            | 01.08.2012                       | 3.7        | 5              | 135        |
| 26            | 31.08.2012                       | 4.8        | 4.8            | 185        |
| 27            | 17.06.2013                       | 1.6        | 6.8            | 235        |
| 28            | 04.03.2004                       | 2          | 4.8            | 243        |
| 29            | 21.07.2004                       | 2.9        | 28.7           | 216        |
| 30            | 11.08.2004                       | 3.6        | 1.2            | 360        |
| 31            | 22.09.2004                       | 2.5        | 1.2            | 151        |
| 32            | 14.02.2005                       | 2.2        | 1.2            | 370        |
| 33            | 02.05.2005                       | 4.6        | 1.2            | 140        |
| 38            | 14.07.2003                       | 5.1        | 2.4            | 148        |
| 39            | 20.01.2004                       | 5.8        | 1.7            | 295        |
| 40            | 27.04.2004                       | 4.7        | 1.2            | 196        |
| 41            | 11.06.2004                       | 4.3        | 1.2            | 188        |
| 42            | 01.09.2004                       | 5.1        | 1.2            | 147        |
| 43            | 04.11.2004                       | 5.1        | 1.2            | 140        |
| 44            | 08.06.2005                       | -9         | -9             | -9         |
| 45            | 28.07.2005                       | 5          | 1.2            | 210        |
| 46            | 04.03.2011                       | 151.1      | 1.2            | 174        |
| 47            | 12.08.2016                       | 110.7      | 1.2            | 153        |
| 48            | 11.11.2016                       | 2          | 2.4            | 199        |
| 51            | 18.03.2003                       | -9         | -9             | -9         |
| 52            | 06.05.2003                       | -9         | -9             | -9         |
| 53            | 09.07.2003                       | 1652.3     | 0              | 191        |
| 55            | 30.06.2000                       | 4.2        | 1.2            | 189        |
| 56            | 11.11.2010                       | 4.6        | 1.2            | 200        |

|    |            |       |     |     |
|----|------------|-------|-----|-----|
| 57 | 06.05.2011 | 5.2   | 1.2 | 204 |
| 58 | 03.11.2011 | 5.3   | 1.2 | 251 |
| 59 | 19.12.2014 | 235.6 | -9  | 195 |
| 60 | 03.06.2016 | 244.6 | 1.2 | 174 |
| 61 | 23.06.2016 |       |     |     |

---





| <b>miR371-miR30b)</b> | <b>miR367-miR30b)</b> | <b>Histology</b> |
|-----------------------|-----------------------|------------------|
| 0                     | 0.0221738             | NSGCT            |
| 0                     | 0.00030583            | NSGCT            |
| 0                     | 0.0003513             | NSGCT            |
| 0                     | 0                     | NSGCT            |
| 0                     | 0.00013925            | NSGCT            |
| 0                     | 0                     | NSGCT            |
| 0                     | 0                     | NSGCT            |
| 0                     | 0                     | NSGCT            |
| 0                     | 0                     | NSGCT            |
| 0.00088625            | 0                     | NSGCT            |
| 0                     | 0                     | NSGCT            |
| 0                     | 0                     | NSGCT            |
| 0                     | 0.00004286            | NSGCT            |
| 0                     | 0.00018761            | NSGCT            |
| 0                     | 0.00002877            | NSGCT            |
| 0                     | 0                     | NSGCT            |
| 0                     | 0                     | NSGCT            |
| 0                     | 0                     | SGCT             |
| 0                     | 0.00012335            | SGCT             |
| 0                     | 0                     | SGCT             |
| 0                     | 0                     | SGCT             |
| 0.00587987            | 0                     | SGCT             |
| 0                     | 0.00004546            | NSGCT            |
| 0                     | 0.00007998            | NSGCT            |
| 0                     | 0.00007567            | NSGCT            |
| 0.00144973            | 0                     | SGCT             |
| 0.00005636            | 0                     | SGCT             |
| 0                     | 0.00010159            | SGCT             |
| 0                     | 0.00015886            | SGCT             |
| 0                     | 0                     | SGCT             |
| 0                     | 0                     | SGCT             |
| 0                     | 0                     | SGCT             |
| 0.00519018            | 1813065.984           | SGCT             |
| 0                     | 0                     | SGCT             |
| 0                     | 345901.0818           | SGCT             |
| 0                     | 0                     | SGCT             |
| 0.00268661            | 0                     | SGCT             |
| 0                     | 1819360.493           | SGCT             |
| 0                     | 661325.0389           | SGCT             |
| 0                     | 565826.4137           | SGCT             |
| 0                     | 0                     | NSGCT            |
| 0                     | 0                     | NSGCT            |
| 0.00754638            | 0.00319493            | SGCT             |
| 0                     | 0.82359102            | SGCT             |
| 0                     | 0.00341239            | SGCT             |
| 0.00508337            | 0.0209777             | NSGCT            |
| 0                     | 0.00007752            | NSGCT            |

|   |            |       |
|---|------------|-------|
| 0 | 0          | NSGCT |
| 0 | 0.00106495 | NSGCT |
| 0 | 0.00280069 | NSGCT |
| 0 | 0          | NSGCT |
| 0 | 0          | NSGCT |

---
